# Supplementary material for: Development of a Fixed-Wing Drone System for Aerial Insect Sampling
Source: MDPI journal article supplement (doi:10.3390/drones6080189), 2022-07-28
Supplement: s1 [file s1]

## Supplementary information

### Figures

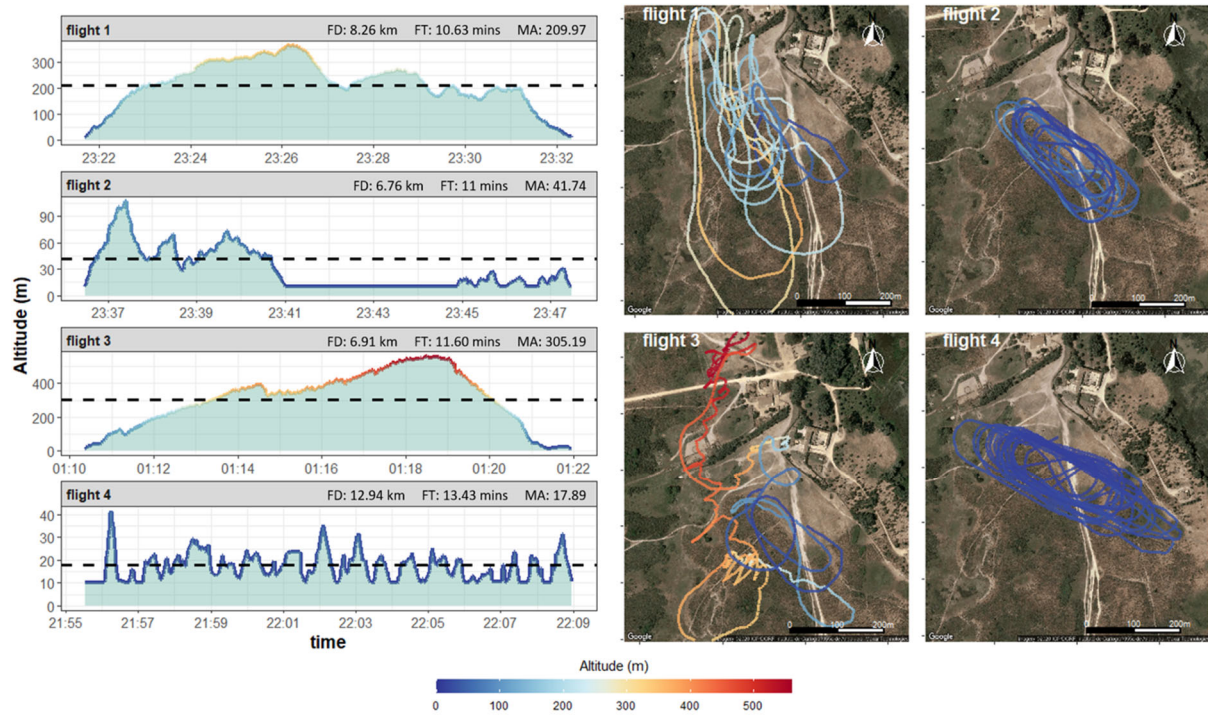

(a)

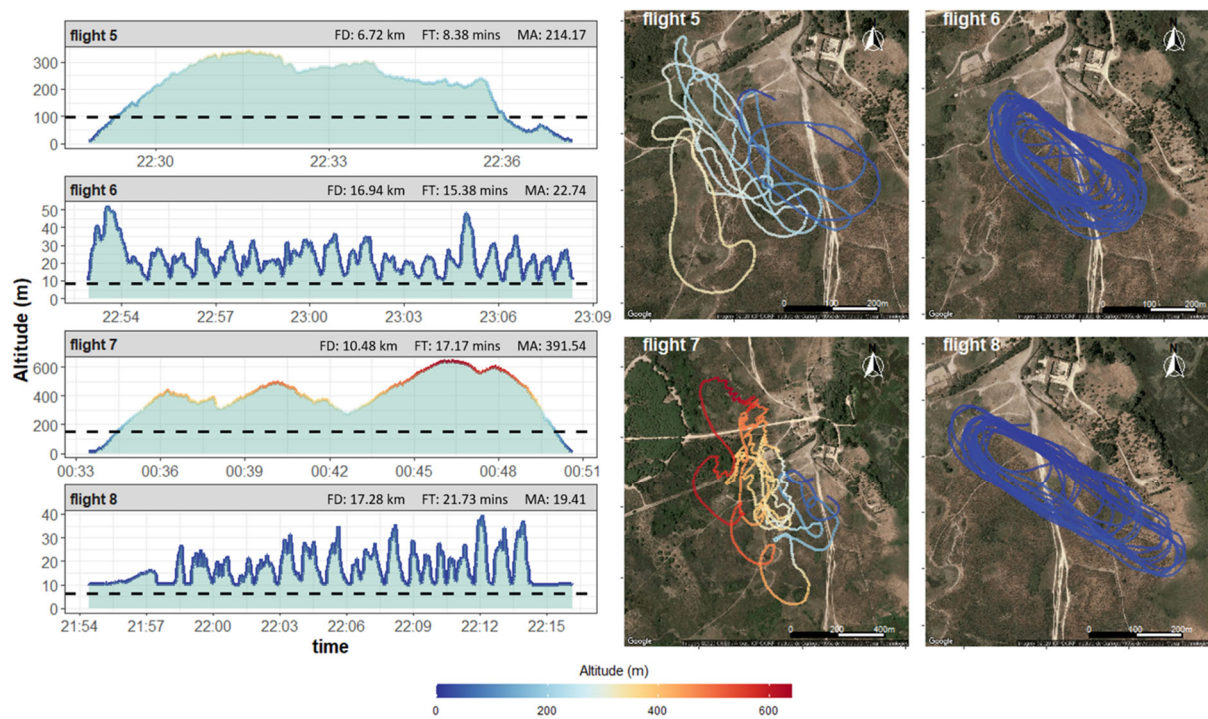

(b)

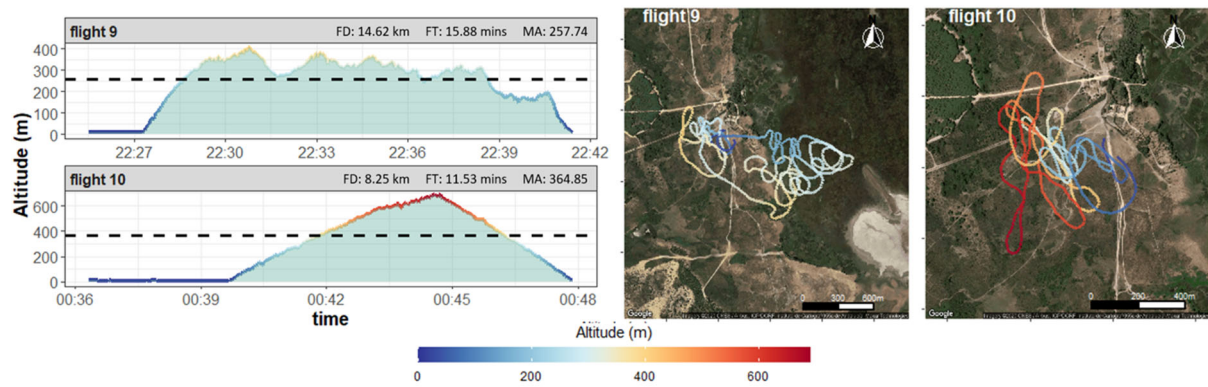

(c)

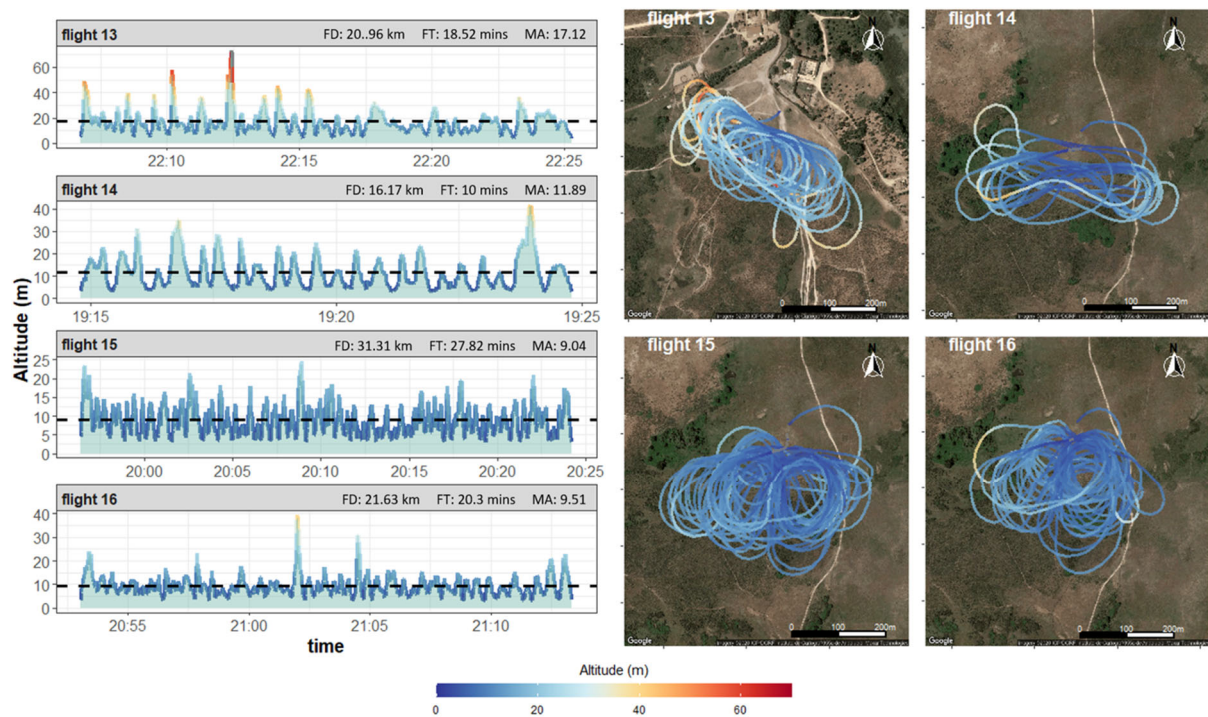

(d)

**Figure S1 a, b, c, d.** Drone paths 1-16 (excluding 11 and 12) showing altitude ranges and mean (black dashed line) with flight dynamics including: total flight distance (FD), total flight time (FT), and mean altitude flown (MA). Telemetry for take-off and landing data was clipped and removed at <10 m for May flights (1-10), and <3 m for September flights (13-16).
